# Supplementary material for: Integrated microRNA and mRNA gene expression in peripheral blood mononuclear cells in response to acute psychosocial stress: a repeated-measures within-subject pilot study
Source: BMC Res Notes. 2021 Jun 3;14:222. doi: 10.1186/s13104-021-05635-3 (PMC8176593; doi:10.1186/s13104-021-05635-3)
Supplement: Supplementary file 2 — Additional file 2: Table S2A–C. mRNA/miRNA expression pairings. Negatively correlated mRNA/miRNA pairs identified by IPA Target Filter analysis at Time Point B vs A, Time Point C vs A and Time Point C vs B are presented in Table S2A-C, respectively. [file 13104_2021_5635_MOESM2_ESM.xlsx]

## Sheet: mRNA-miRNA_BvsA
Table S2A. mRNA/miRNA expression pairing at contrast B vs A
miRNA	Fold Change	Source	Confidence	mRNA	Fold Change
miR-1185-5p	1.1	TargetScan Human	Moderate (predicted)	RNF187	-1.1
miR-129-5p	1.2	TargetScan Human	Moderate (predicted)	HOXC10	-1.1
miR-301b	1.089	TargetScan Human	High (predicted)	MMP19	-1.1
miR-137-3p	-1.2	TargetScan Human	Moderate (predicted)	ANKRD12	1.1
		TargetScan Human	Moderate (predicted)	FBXW7	1.1
		TargetScan Human	Moderate (predicted)	GPCPD1	1.1
miR-210-3p	1.04102	TargetScan Human	High (predicted)	PGAM5	-1
miR-3191-3p	1.089	TargetScan Human	Moderate (predicted)	C19orf12	-1.2
		TargetScan Human	Moderate (predicted)	CS	-1.1
		TargetScan Human	Moderate (predicted)	DISP3	-1.1
		TargetScan Human	High (predicted)	FGF18	-1.1
		TargetScan Human	Moderate (predicted)	MMP19	-1.1
		TargetScan Human	Moderate (predicted)	SYS1	-1.1
		TargetScan Human	Moderate (predicted)	TMEM161A	-1.1
miR-518a-3p	-1.2	TargetScan Human	Moderate (predicted)	CEMIP2	1.1
miR-614	-1.2	TargetScan Human	Moderate (predicted)	GPCPD1	1.1
miR-92a-3p	-1.2	TargetScan Human	Moderate (predicted)	BAZ2B	1.1
		Ingenuity Expert Findings	Experimentally Observed	FBXW7	1.1
miR-937-3p	1.09354	TargetScan Human	High (predicted)	H2AX	-1.124

## Sheet: mRNA-miRNA CvsA
Table S2B. mRNA/miRNA expression pairing at contrast C vs A
miRNA	Fold Change	Source	Confidence	mRNA	Fold Change
miR-3178	-1.21167	TargetScan Human	Moderate (predicted)	C9orf62	1.089
		TargetScan Human	High (predicted)	MEX3B	1.062
miR-301b	-1.14472	TargetScan Human	Moderate (predicted)	ADGRB3	1.074
		TargetScan Human	High (predicted)	CPEB2	1.125
		TargetScan Human	Moderate (predicted)	LBR	1.094
miR-137-3p	-1.08073	TargetScan Human	Moderate (predicted)	GPCPD1	1.155
miR-210-3p	-1.3	TargetScan Human	Moderate (predicted)	CPEB2	1.125
		TargetScan Human	High (predicted)	MEX3B	1.062
miR-3191-3p	-1.1065	TargetScan Human	Moderate (predicted)	EVX2	1.084
miR-614	-1.05336	TargetScan Human	Moderate (predicted)	GPCPD1	1.155
miR-624-3p	1.16716	TargetScan Human	Moderate (predicted)	CCND2	-1.101
		TargetScan Human	Moderate (predicted)	NCAPD2	-1.123
		TargetScan Human	High (predicted)	UBE2G1	-1.067
miR-9-5p	-1.26138	TargetScan Human	Moderate (predicted)	CPEB2	1.125
miR-92a-2-5p	1.01819	TargetScan Human	Moderate (predicted)	CCND2	-1.101
		TargetScan Human	Moderate (predicted)	DCAF7	-1.15
		TargetScan Human	Moderate (predicted)	HIPK2	-1.092
		TargetScan Human	Moderate (predicted)	LIX1L	-1.085
		TargetScan Human	Moderate (predicted)	PI4KB	-1.061
miR-92a-3p	1.01819	TargetScan Human	Moderate (predicted)	ACAT2	-1.107
		Ingenuity Expert Findings	Experimentally Observed	IKZF1	-1.111
		TargetScan Human	High (predicted)	RAB23	-1.124

## Sheet: mRNA-miRNA CvsB
Table S2C mRNA/miRNA expression pairing at contrast C vs B
miRNA	FC	Source	Confidence	mRNA	Fold Change
miR-3178	-1.04319	TargetScan Human	Moderate (predicted)	C9orf62	1.118
		TargetScan Human	High (predicted)	MEX3B	1.077
		TargetScan Human	Moderate (predicted)	PERM1	1.083
		TargetScan Human	High (predicted)	PRDM12	1.079
		TargetScan Human	Moderate (predicted)	ZSCAN10	1.066
miR-1185-5p	-1.20247	TargetScan Human	Moderate (predicted)	ADM2	1.101
		TargetScan Human	Moderate (predicted)	CPN2	1.083
		TargetScan Human	High (predicted)	VWC2	1.111
miR-129-5p	-1.08598	TargetScan Human	Moderate (predicted)	HOXC10	1.08
		TargetScan Human	Moderate (predicted)	LTA	1.099
miR-301b	-1.2466	TargetScan Human	Moderate (predicted)	ADGRB3	1.076
		TargetScan Human	Moderate (predicted)	AJAP1	1.092
		TargetScan Human	Moderate (predicted)	GRK7	1.065
		TargetScan Human	Moderate (predicted)	PSD	1.089
		TargetScan Human	Moderate (predicted)	PWWP3B	1.099
		TargetScan Human	Moderate (predicted)	SHANK2	1.075
miR-137-3p	1.13131	TargetScan Human	Moderate (predicted)	MTRES1	-1.125
miR-210-3p	-1.29954	TargetScan Human	Moderate (predicted)	LTA	1.099
		TargetScan Human	High (predicted)	MEX3B	1.077
miR-3191-3p	-1.20497	TargetScan Human	Moderate (predicted)	CAMK2A	1.066
		TargetScan Human	Moderate (predicted)	CAMK2B	1.094
		TargetScan Human	Moderate (predicted)	CLSTN2	1.082
		TargetScan Human	Moderate (predicted)	CX3CL1	1.073
		TargetScan Human	Moderate (predicted)	GRK7	1.065
		TargetScan Human	Moderate (predicted)	MYOZ3	1.123
		TargetScan Human	Moderate (predicted)	PRTN3	1.084
miR-518a-3p	1.21251	TargetScan Human	Moderate (predicted)	CEMIP2	-1.16
miR-9-5p	-1.2	TargetScan Human	Moderate (predicted)	CPA4	1.075
		TargetScan Human	Moderate (predicted)	KIAA2013	1.096
		TargetScan Human	Moderate (predicted)	PWWP3B	1.099
		TargetScan Human	High (predicted)	TFF2	1.069
miR-92a-3p	1.22095	TargetScan Human	Moderate (predicted)	ACAT2	-1.1
	1.22095	TargetScan Human	Moderate (predicted)	KLHDC10	-1.1
